# Supplementary material
Source: publisher figshare collection journal article supplement (https://asha.figshare.com/articles/dataset/_/14963958)
Supplement: Supplementary file 1 [file 1]

### Supplemental Material S3. Results of the regression model of the production study.

| Line | Dependent variable | Effects                                | Estimates  | <i>t</i> | Adjusted <i>p</i> |
|------|--------------------|----------------------------------------|------------|----------|-------------------|
| 1    | F0                 | (Intercept)                            | 163.0460   | 11.9240  | .0039             |
| 2    | F0                 | spGroup(NW)                            | 54.8714    | 4.4500   | .0048             |
| 3    | F0                 | spGroup(NM)                            | −34.0572   | −2.7641  | .2205             |
| 4    | F0                 | vow(l)                                 | −2.3333    | −0.7917  | 1.0000            |
| 5    | F0                 | vow(U)                                 | 17.5840    | 4.8429   | .0005             |
| 6    | F0                 | stimClass(word)                        | −9.4053    | −0.7804  | 1.0000            |
| 7    | F0                 | spGroup(NW) × vow(l)                   | 7.6863     | 1.8623   | .8696             |
| 8    | F0                 | spGroup(NM) × vow(l)                   | 5.7844     | 1.4109   | 1.0000            |
| 9    | F0                 | spGroup(NW) × vow(U)                   | −10.1789   | −1.9808  | .7591             |
| 10   | F0                 | spGroup(NM) × vow(U)                   | −15.9265   | −3.1600  | .0651             |
| 11   | F0                 | spGroup(NW) × stimClass(word)          | 8.2865     | 1.9039   | .7936             |
| 12   | F0                 | spGroup(NM) × stimClass(word)          | 11.5574    | 2.6684   | .1812             |
| 13   | F0                 | vow(l) × stimClass(word)               | −1.5549    | −0.1697  | 1.0000            |
| 14   | F0                 | vow(U) × stimClass(word)               | −12.8755   | −1.6435  | 1.0000            |
| 15   | F0                 | spGroup(NW) × vow(l) × stimClass(word) | −6.3079    | −0.9611  | 1.0000            |
| 16   | F0                 | spGroup(NM) × vow(l) × stimClass(word) | 0.9500     | 0.1451   | 1.0000            |
| 17   | F0                 | spGroup(NW) × vow(U) × stimClass(word) | 8.0672     | 1.3441   | 1.0000            |
| 18   | F0                 | spGroup(NM) × vow(U) × stimClass(word) | 13.4365    | 2.2588   | .4126             |
| 19   | F1                 | (Intercept)                            | 517.9164   | 29.6719  | 0.0000            |
| 20   | F1                 | spGroup(NW)                            | 1.6141     | 0.1281   | 1.0000            |
| 21   | F1                 | spGroup(NM)                            | −69.6392   | −5.5326  | .0005             |
| 22   | F1                 | vow(l)                                 | −128.9993  | −14.2606 | 0.0000            |
| 23   | F1                 | vow(U)                                 | −116.3399  | −11.6041 | 0.0000            |
| 24   | F1                 | spGroup(NW) × vow(l)                   | −10.7744   | −0.8800  | 1.0000            |
| 25   | F1                 | spGroup(NM) × vow(l)                   | 13.8420    | 1.1315   | 1.0000            |
| 26   | F1                 | spGroup(NW) × vow(U)                   | −11.0336   | −0.8129  | 1.0000            |
| 27   | F1                 | spGroup(NM) × vow(U)                   | 37.6593    | 2.7804   | .2205             |
| 28   | F2                 | (Intercept)                            | 1,634.9740 | 26.0247  | 0.0000            |
| 29   | F2                 | spGroup(NW)                            | 58.4685    | 2.0311   | .7591             |
| 30   | F2                 | spGroup(NM)                            | −186.7812  | −6.4930  | 0.0000            |
| 31   | F2                 | vow(l)                                 | 947.2110   | 37.0374  | 0.0000            |
| 32   | F2                 | vow(U)                                 | −713.0643  | −30.9249 | 0.0000            |
| 33   | F2                 | spGroup(NW) × vow(l)                   | 86.2700    | 2.4760   | .3579             |
| 34   | F2                 | spGroup(NM) × vow(l)                   | −114.8286  | −3.2972  | .0703             |
| 35   | F2                 | spGroup(NW) × vow(U)                   | −99.0123   | −3.1948  | .0869             |
| 36   | F2                 | spGroup(NM) × vow(U)                   | 127.0573   | 4.1084   | .0130             |
| 37   | H1–H2              | (Intercept)                            | 0.1086     | 0.0626   | 1.0000            |
| 38   | H1–H2              | spGroup(NW)                            | 5.9230     | 3.7183   | .0233             |
| 39   | H1–H2              | spGroup(NM)                            | −3.9869    | −2.5075  | .3414             |
| 40   | H1–H2              | vow(l)                                 | 0.1679     | 0.1460   | 1.0000            |
| 41   | H1–H2              | vow(U)                                 | 0.8577     | 0.8366   | 1.0000            |

|    |        |                                        |         |         |        |
|----|--------|----------------------------------------|---------|---------|--------|
| 42 | H1-H2  | stimClass(word)                        | -1.1896 | -0.7533 | 1.0000 |
| 43 | H1-H2  | spGroup(NW) x vow(I)                   | -1.5082 | -0.9350 | 1.0000 |
| 44 | H1-H2  | spGroup(NM) x vow(I)                   | -1.6634 | -1.0332 | 1.0000 |
| 45 | H1-H2  | spGroup(NW) x vow(U)                   | 3.5293  | 2.4385  | .3579  |
| 46 | H1-H2  | spGroup(NM) x vow(U)                   | -1.1644 | -0.8126 | 1.0000 |
| 47 | H1-H2  | spGroup(NW) x stimClass(word)          | -0.4023 | -0.4729 | 1.0000 |
| 48 | H1-H2  | spGroup(NM) x stimClass(word)          | 1.7476  | 2.0656  | .6311  |
| 49 | H1-H2  | vow(I) x stimClass(word)               | -0.5394 | -0.3967 | 1.0000 |
| 50 | H1-H2  | vow(U) x stimClass(word)               | -0.0847 | -0.0723 | 1.0000 |
| 51 | H1-H2  | spGroup(NW) x vow(I) x stimClass(word) | 1.2562  | 0.9738  | 1.0000 |
| 52 | H1-H2  | spGroup(NM) x vow(I) x stimClass(word) | 0.2352  | 0.1828  | 1.0000 |
| 53 | H1-H2  | spGroup(NW) x vow(U) x stimClass(word) | -3.6771 | -3.1403 | .0489  |
| 54 | H1-H2  | spGroup(NM) x vow(U) x stimClass(word) | 1.1055  | 0.9536  | 1.0000 |
| 55 | H2-H4  | (Intercept)                            | 8.1431  | 3.8496  | .3687  |
| 56 | H2-H4  | spGroup(NW)                            | -2.9752 | -1.4947 | 1.0000 |
| 57 | H2-H4  | spGroup(NM)                            | 4.1988  | 2.1158  | .6650  |
| 58 | H2-H4  | vow(I)                                 | 3.4290  | 1.8244  | .9555  |
| 59 | H2-H4  | vow(U)                                 | 3.0531  | 1.9623  | .7936  |
| 60 | H2-H4  | stimClass(word)                        | 0.7465  | 0.3743  | 1.0000 |
| 61 | H2-H4  | spGroup(NW) x vow(I)                   | 1.4081  | 0.5335  | 1.0000 |
| 62 | H2-H4  | spGroup(NM) x vow(I)                   | -1.3766 | -0.5225 | 1.0000 |
| 63 | H2-H4  | spGroup(NW) x vow(U)                   | -7.7023 | -3.5078 | .0326  |
| 64 | H2-H4  | spGroup(NM) x vow(U)                   | 6.9415  | 3.1966  | .0711  |
| 65 | H2-H4  | spGroup(NW) x stimClass(word)          | 3.3436  | 2.4755  | .2807  |
| 66 | H2-H4  | spGroup(NM) x stimClass(word)          | -2.6096 | -1.9426 | .7591  |
| 67 | H2-H4  | vow(I) x stimClass(word)               | -0.9658 | -0.5083 | 1.0000 |
| 68 | H2-H4  | vow(U) x stimClass(word)               | -1.1238 | -0.6801 | 1.0000 |
| 69 | H2-H4  | spGroup(NW) x vow(I) x stimClass(word) | -8.6764 | -4.2338 | .0013  |
| 70 | H2-H4  | spGroup(NM) x vow(I) x stimClass(word) | 1.0649  | 0.5209  | 1.0000 |
| 71 | H2-H4  | spGroup(NW) x vow(U) x stimClass(word) | 10.0898 | 5.4213  | 0.0000 |
| 72 | H2-H4  | spGroup(NM) x vow(U) x stimClass(word) | -1.7768 | -0.9644 | 1.0000 |
| 73 | Energy | (Intercept)                            | 0.2363  | 0.9157  | 1.0000 |
| 74 | Energy | spGroup(NW)                            | -0.0631 | -0.2010 | 1.0000 |
| 75 | Energy | spGroup(NM)                            | 0.5523  | 1.7622  | 1.0000 |
| 76 | Energy | vow(I)                                 | -0.0734 | -0.6859 | 1.0000 |
| 77 | Energy | vow(U)                                 | -0.0319 | -0.2979 | 1.0000 |
| 78 | Energy | stimClass(word)                        | 0.0933  | 0.5610  | 1.0000 |
| 79 | Energy | spGroup(NW) x vow(I)                   | -0.0325 | -0.2157 | 1.0000 |
| 80 | Energy | spGroup(NM) x vow(I)                   | -0.2375 | -1.5800 | 1.0000 |
| 81 | Energy | spGroup(NW) x vow(U)                   | 0.0406  | 0.2677  | 1.0000 |
| 82 | Energy | spGroup(NM) x vow(U)                   | -0.4567 | -3.0533 | .0872  |
| 83 | Energy | spGroup(NW) x stimClass(word)          | -0.0463 | -0.4156 | 1.0000 |
| 84 | Energy | spGroup(NM) x stimClass(word)          | -0.1009 | -0.9096 | 1.0000 |
| 85 | Energy | vow(I) x stimClass(word)               | -0.0981 | -0.6316 | 1.0000 |
| 86 | Energy | vow(U) x stimClass(word)               | 0.0983  | 0.7162  | 1.0000 |
| 87 | Energy | spGroup(NW) x vow(I) x stimClass(word) | 0.0695  | 0.4158  | 1.0000 |

|     |        |                                        |         |         |        |
|-----|--------|----------------------------------------|---------|---------|--------|
| 88  | Energy | spGroup(NM) × vow(l) × stimClass(word) | 0.3049  | 1.8281  | .8736  |
| 89  | Energy | spGroup(NW) × vow(U) × stimClass(word) | −0.0965 | −0.6275 | 1.0000 |
| 90  | Energy | spGroup(NM) × vow(U) × stimClass(word) | 0.1699  | 1.1145  | 1.0000 |
| 91  | CPP    | (Intercept)                            | 21.0998 | 16.6935 | 0.0000 |
| 92  | CPP    | spGroup(NW)                            | 1.3709  | 0.9801  | 1.0000 |
| 93  | CPP    | spGroup(NM)                            | 3.4635  | 2.4773  | .3579  |
| 94  | CPP    | vow(l)                                 | 0.0278  | 0.0836  | 1.0000 |
| 95  | CPP    | vow(U)                                 | −1.9210 | −7.3241 | 0.0000 |
| 96  | CPP    | stimClass(word)                        | −0.0846 | −0.0919 | 1.0000 |
| 97  | CPP    | spGroup(NW) × vow(l)                   | −0.0326 | −0.0732 | 1.0000 |
| 98  | CPP    | spGroup(NM) × vow(l)                   | 1.2189  | 2.7420  | .2371  |
| 99  | CPP    | spGroup(NW) × vow(U)                   | −1.4353 | −4.2774 | .0083  |
| 100 | CPP    | spGroup(NM) × vow(U)                   | −0.5899 | −1.7716 | 1.0000 |
| 101 | CPP    | spGroup(NW) × stimClass(word)          | 0.7646  | 1.6943  | 1.0000 |
| 102 | CPP    | spGroup(NM) × stimClass(word)          | −0.5395 | −1.1998 | 1.0000 |
| 103 | HNR05  | (Intercept)                            | 44.2894 | 16.1976 | 0.0000 |
| 104 | HNR05  | spGroup(NW)                            | 4.5108  | 1.2545  | 1.0000 |
| 105 | HNR05  | spGroup(NM)                            | 0.6309  | 0.1756  | 1.0000 |
| 106 | HNR05  | vow(l)                                 | −3.0105 | −3.2144 | .0737  |
| 107 | HNR05  | vow(U)                                 | −1.4019 | −1.4747 | 1.0000 |
| 108 | HNR05  | stimClass(word)                        | −1.3727 | −0.9585 | 1.0000 |
| 109 | HNR05  | spGroup(NW) × vow(l)                   | −0.2974 | −0.2326 | 1.0000 |
| 110 | HNR05  | spGroup(NM) × vow(l)                   | 2.6245  | 2.0569  | .7347  |
| 111 | HNR05  | spGroup(NW) × vow(U)                   | −5.0781 | −3.9150 | .0161  |
| 112 | HNR05  | spGroup(NM) × vow(U)                   | −1.4074 | −1.0904 | 1.0000 |
| 113 | HNR05  | spGroup(NW) × stimClass(word)          | 1.6508  | 1.2904  | 1.0000 |
| 114 | HNR05  | spGroup(NM) × stimClass(word)          | −4.4454 | −3.4910 | .0161  |
| 115 | HNR15  | (Intercept)                            | 49.5562 | 13.2265 | .0005  |
| 116 | HNR15  | spGroup(NW)                            | 3.7895  | 1.3192  | 1.0000 |
| 117 | HNR15  | spGroup(NM)                            | 0.9379  | 0.3268  | 1.0000 |
| 118 | HNR15  | vow(l)                                 | 3.8790  | 3.9210  | .0142  |
| 119 | HNR15  | vow(U)                                 | 1.9863  | 2.3260  | .4257  |
| 120 | HNR15  | stimClass(word)                        | −1.4810 | −0.4161 | 1.0000 |
| 121 | HNR15  | spGroup(NW) × vow(l)                   | −0.0555 | −0.0417 | 1.0000 |
| 122 | HNR15  | spGroup(NM) × vow(l)                   | 2.6022  | 1.9567  | .8217  |
| 123 | HNR15  | spGroup(NW) × vow(U)                   | −5.2757 | −4.7305 | .0024  |
| 124 | HNR15  | spGroup(NM) × vow(U)                   | −1.7630 | −1.5903 | 1.0000 |
| 125 | HNR15  | spGroup(NW) × stimClass(word)          | 2.1429  | 1.7406  | 1.0000 |
| 126 | HNR15  | spGroup(NM) × stimClass(word)          | −4.2735 | −3.4861 | .0161  |
| 127 | HNR25  | (Intercept)                            | 53.3183 | 29.5108 | 0.0000 |
| 128 | HNR25  | spGroup(NW)                            | 4.0109  | 1.5705  | 1.0000 |
| 129 | HNR25  | spGroup(NM)                            | −0.3516 | −0.1378 | 1.0000 |
| 130 | HNR25  | vow(l)                                 | 1.9458  | 2.2093  | .5513  |
| 131 | HNR25  | vow(U)                                 | 3.6547  | 4.7165  | .0013  |
| 132 | HNR25  | stimClass(word)                        | −2.9085 | −3.5039 | .0161  |
| 133 | HNR25  | spGroup(NW) × vow(l)                   | 1.7183  | 1.4617  | 1.0000 |

|     |       |                                        |         |         |        |
|-----|-------|----------------------------------------|---------|---------|--------|
| 134 | HNR25 | spGroup(NM) × vow(I)                   | 1.0620  | 0.9049  | 1.0000 |
| 135 | HNR25 | spGroup(NW) × vow(U)                   | −5.4145 | −5.4323 | .0005  |
| 136 | HNR25 | spGroup(NM) × vow(U)                   | −1.1332 | −1.1442 | 1.0000 |
| 137 | HNR25 | spGroup(NW) × stimClass(word)          | 2.1887  | 1.9018  | .7936  |
| 138 | HNR25 | spGroup(NM) × stimClass(word)          | −4.1000 | −3.5779 | .0136  |
| 139 | HNR25 | vow(I) × stimClass(word)               | −1.6483 | −2.3121 | .3687  |
| 140 | HNR25 | vow(U) × stimClass(word)               | −1.0989 | −1.6854 | 1.0000 |
| 141 | HNR35 | (Intercept)                            | 52.4879 | 31.1122 | 0.0000 |
| 142 | HNR35 | spGroup(NW)                            | 4.2072  | 1.7637  | 1.0000 |
| 143 | HNR35 | spGroup(NM)                            | −1.3929 | −0.5846 | 1.0000 |
| 144 | HNR35 | vow(I)                                 | −0.3462 | −0.4355 | 1.0000 |
| 145 | HNR35 | vow(U)                                 | 4.7508  | 5.8669  | 0.0000 |
| 146 | HNR35 | stimClass(word)                        | −2.3676 | −3.0403 | .0651  |
| 147 | HNR35 | spGroup(NW) × vow(I)                   | 2.2512  | 2.0195  | .7339  |
| 148 | HNR35 | spGroup(NM) × vow(I)                   | 2.2855  | 2.0610  | .6793  |
| 149 | HNR35 | spGroup(NW) × vow(U)                   | −4.2515 | −3.7062 | .0142  |
| 150 | HNR35 | spGroup(NM) × vow(U)                   | −0.5297 | −0.4722 | 1.0000 |
| 151 | HNR35 | spGroup(NW) × stimClass(word)          | 1.6594  | 1.5306  | 1.0000 |
| 152 | HNR35 | spGroup(NM) × stimClass(word)          | −4.6701 | −4.3224 | .0009  |
| 153 | HNR35 | vow(I) × stimClass(word)               | −0.1186 | −0.1008 | 1.0000 |
| 154 | HNR35 | vow(U) × stimClass(word)               | −0.0988 | −0.0926 | 1.0000 |
| 155 | HNR35 | spGroup(NW) × vow(I) × stimClass(word) | −0.9135 | −0.5604 | 1.0000 |
| 156 | HNR35 | spGroup(NM) × vow(I) × stimClass(word) | −2.4797 | −1.5235 | 1.0000 |
| 157 | HNR35 | spGroup(NW) × vow(U) × stimClass(word) | −2.0027 | −1.3408 | 1.0000 |
| 158 | HNR35 | spGroup(NM) × vow(U) × stimClass(word) | −2.2587 | −1.5237 | 1.0000 |
| 159 | SHR   | (Intercept)                            | 0.3702  | 7.8349  | 0.0000 |
| 160 | SHR   | spGroup(NW)                            | −0.1605 | −2.4025 | .3687  |
| 161 | SHR   | spGroup(NM)                            | −0.0417 | −0.6274 | 1.0000 |
| 162 | SHR   | vow(I)                                 | −0.0549 | −1.3000 | 1.0000 |
| 163 | SHR   | vow(U)                                 | −0.0989 | −1.7162 | 1.0000 |
| 164 | SHR   | stimClass(word)                        | −0.0128 | −0.3075 | 1.0000 |
| 165 | SHR   | spGroup(NW) × vow(I)                   | −0.1538 | −2.5976 | .2506  |
| 166 | SHR   | spGroup(NM) × vow(I)                   | 0.1487  | 2.5258  | .2921  |
| 167 | SHR   | spGroup(NW) × vow(U)                   | 0.1972  | 2.4190  | .3579  |
| 168 | SHR   | spGroup(NM) × vow(U)                   | 0.0499  | 0.6211  | 1.0000 |
| 169 | SHR   | spGroup(NW) × stimClass(word)          | 0.1249  | 2.1402  | .5408  |
| 170 | SHR   | spGroup(NM) × stimClass(word)          | −0.0438 | −0.7538 | 1.0000 |
| 171 | SHR   | vow(I) × stimClass(word)               | −0.0086 | −0.1358 | 1.0000 |
| 172 | SHR   | vow(U) × stimClass(word)               | 0.1159  | 2.0243  | .6776  |
| 173 | SHR   | spGroup(NW) × vow(I) × stimClass(word) | 0.3030  | 3.4430  | .0183  |
| 174 | SHR   | spGroup(NM) × vow(I) × stimClass(word) | −0.1056 | −1.2023 | 1.0000 |
| 175 | SHR   | spGroup(NW) × vow(U) × stimClass(word) | −0.1436 | −1.7845 | .9402  |
| 176 | SHR   | spGroup(NM) × vow(U) × stimClass(word) | −0.1946 | −2.4403 | .2985  |

*Note.* Significant results are highlighted in gray. Column 2 = Labels of the dependent variables; Column 3 = labels of the tested parameters; Column 4 = model estimates; Column 5 = *t* values;

Column 6 =  $p$  values adjusted according to the False Discovery Rate criterion (Benjamini & Yekutieli, 2001).

## **Reference**

Benjamini, Y., & Yekutieli, D. (2001). The control of the false discovery rate in multiple testing under dependency. *Annals of Statistics*, 29, 1165–1168. doi:10.1214/aos/1013699998
