# Supplementary material
Source: publisher figshare collection journal article supplement (https://asha.figshare.com/articles/dataset/_/14963958)
Supplement: Supplementary file 3 [file 1]

## Supplemental Material S2. Instructions in Lebanese Arabic for the self-evaluation study.

صنف صوتك على سلم من ١ الى ٩ حيث ١ يرمز الى صوت كثير الرجولة و ٩ الى صوت نسائي جداً

1 9

♂ ♀

الجواب بالارقام

صنف شخصيتك على سلم من ١ الى ٩ حيث ١ يرمز الى شخصية كثيرة الرجولة و ٩ الى شخصية نسائية جداً

1 9

♂ ♀

الجواب بالارقام
