# Supplementary material
Source: publisher figshare collection journal article supplement (https://asha.figshare.com/articles/dataset/_/14963958)
Supplement: Supplementary file 4 [file 1]

# Supplemental Material S4. Mixed models for the relation between the perception and production study.

| Line | Factors of interest | Effects              | Estimates | <i>t</i> | Adjusted <i>p</i> |
|------|---------------------|----------------------|-----------|----------|-------------------|
| 1    | F0                  | (Intercept)          | 3.4265    | 14.8219  | 0.0000            |
| 2    | F0                  | F0                   | −0.0037   | −2.9930  | .0298             |
| 3    | F0                  | spGroup(NW)          | −0.7018   | −3.9137  | .0095             |
| 4    | F0                  | spGroup(NM)          | 1.0376    | 6.1166   | .0001             |
| 5    | F0                  | vow(l)               | −0.1402   | −1.7674  | .5639             |
| 6    | F0                  | vow(U)               | 0.3986    | 4.7003   | .0001             |
| 7    | F0                  | spGroup(NW) × vow(l) | 0.1841    | 1.8154   | .5175             |
| 8    | F0                  | spGroup(NM) × vow(l) | 0.1550    | 1.5722   | .7868             |
| 9    | F0                  | spGroup(NW) × vow(U) | −0.3701   | −3.4471  | .0095             |
| 10   | F0                  | spGroup(NM) × vow(U) | −0.3729   | −3.5945  | .0059             |
| 11   | F1                  | (Intercept)          | 2.8339    | 19.8584  | 0.0000            |
| 12   | F1                  | spGroup(NW)          | −0.9079   | −4.5598  | .0021             |
| 13   | F1                  | spGroup(NM)          | 1.1599    | 5.8478   | .0001             |
| 14   | F1                  | vow(l)               | −0.1316   | −1.6569  | .6804             |
| 15   | F1                  | vow(U)               | 0.3330    | 3.9897   | .0017             |
| 16   | F1                  | spGroup(NW) × vow(l) | 0.1542    | 1.5219   | .8323             |
| 17   | F1                  | spGroup(NM) × vow(l) | 0.1352    | 1.3709   | 1.0000            |
| 18   | F1                  | spGroup(NW) × vow(U) | −0.3322   | −3.0947  | .0233             |
| 19   | F1                  | spGroup(NM) × vow(U) | −0.3155   | −3.0615  | .0233             |
| 20   | F2                  | (Intercept)          | 2.8339    | 19.8584  | 0.0000            |
| 21   | F2                  | spGroup(NW)          | −0.9079   | −4.5598  | .0021             |
| 22   | F2                  | spGroup(NM)          | 1.1599    | 5.8478   | .0001             |
| 23   | F2                  | vow(l)               | −0.1316   | −1.6569  | .6804             |
| 24   | F2                  | vow(U)               | 0.3330    | 3.9897   | .0017             |
| 25   | F2                  | spGroup(NW) × vow(l) | 0.1542    | 1.5219   | .8323             |
| 26   | F2                  | spGroup(NM) × vow(l) | 0.1352    | 1.3709   | 1.0000            |
| 27   | F2                  | spGroup(NW) × vow(U) | −0.3322   | −3.0947  | .0233             |
| 28   | F2                  | spGroup(NM) × vow(U) | −0.3155   | −3.0615  | .0233             |
| 29   | H1–H2               | (Intercept)          | 2.8422    | 23.6982  | 0.0000            |
| 30   | H1–H2               | H1–H2                | −0.0351   | −3.3632  | .0122             |
| 31   | H1–H2               | spGroup(NW)          | −0.8947   | −5.1547  | .0008             |
| 32   | H1–H2               | spGroup(NM)          | 1.1672    | 6.7423   | 0.0000            |
| 33   | H1–H2               | vow(l)               | −0.1068   | −1.3353  | 1.0000            |
| 34   | H1–H2               | vow(U)               | 0.3786    | 4.5241   | .0002             |
| 35   | H1–H2               | H1–H2 × spGroup(NW)  | 0.0314    | 2.3567   | .1532             |
| 36   | H1–H2               | H1–H2 × spGroup(NM)  | 0.0391    | 2.3137   | .1695             |
| 37   | H1–H2               | spGroup(NW) × vow(l) | 0.1251    | 1.2231   | 1.0000            |
| 38   | H1–H2               | spGroup(NM) × vow(l) | 0.1181    | 1.1555   | 1.0000            |
| 39   | H1–H2               | spGroup(NW) × vow(U) | −0.3618   | −3.1865  | .0192             |
| 40   | H1–H2               | spGroup(NM) × vow(U) | −0.3614   | −3.5013  | .0082             |
| 41   | H2–H4               | (Intercept)          | 2.8339    | 19.8584  | 0.0000            |

|    |        |                              |         |         |        |
|----|--------|------------------------------|---------|---------|--------|
| 42 | H2-H4  | spGroup(NW)                  | -0.9079 | -4.5598 | .0021  |
| 43 | H2-H4  | spGroup(NM)                  | 1.1599  | 5.8478  | .0001  |
| 44 | H2-H4  | vow(I)                       | -0.1316 | -1.6569 | .6804  |
| 45 | H2-H4  | vow(U)                       | 0.3330  | 3.9897  | .0017  |
| 46 | H2-H4  | spGroup(NW) x vow(I)         | 0.1542  | 1.5219  | .8323  |
| 47 | H2-H4  | spGroup(NM) x vow(I)         | 0.1352  | 1.3709  | 1.0000 |
| 48 | H2-H4  | spGroup(NW) x vow(U)         | -0.3322 | -3.0947 | .0233  |
| 49 | H2-H4  | spGroup(NM) x vow(U)         | -0.3155 | -3.0615 | .0233  |
| 50 | Energy | (Intercept)                  | 2.8110  | 19.0170 | 0.0000 |
| 51 | Energy | Energy                       | 0.1456  | 2.1852  | .2226  |
| 52 | Energy | spGroup(NW)                  | -0.9114 | -4.4338 | .0029  |
| 53 | Energy | spGroup(NM)                  | 1.1383  | 5.5333  | .0003  |
| 54 | Energy | vow(I)                       | -0.1201 | -1.4742 | .8975  |
| 55 | Energy | vow(U)                       | 0.2843  | 3.3097  | .0136  |
| 56 | Energy | Energy x vow(I)              | -0.0598 | -0.9109 | 1.0000 |
| 57 | Energy | Energy x vow(U)              | 0.2094  | 2.3004  | .1715  |
| 58 | Energy | spGroup(NW) x vow(I)         | 0.1626  | 1.5948  | .7586  |
| 59 | Energy | spGroup(NM) x vow(I)         | 0.1272  | 1.2788  | 1.0000 |
| 60 | Energy | spGroup(NW) x vow(U)         | -0.3301 | -3.0729 | .0233  |
| 61 | Energy | spGroup(NM) x vow(U)         | -0.3197 | -3.0682 | .0233  |
| 62 | CPP    | (Intercept)                  | 4.4183  | 10.7838 | 0.0000 |
| 63 | CPP    | CPP                          | -0.0743 | -4.1497 | .0011  |
| 64 | CPP    | spGroup(NW)                  | -2.5235 | -4.9114 | .0001  |
| 65 | CPP    | spGroup(NM)                  | -0.4206 | -0.7515 | 1.0000 |
| 66 | CPP    | CPP x spGroup(NW)            | 0.0756  | 3.4890  | .0086  |
| 67 | CPP    | CPP x spGroup(NM)            | 0.0741  | 3.2131  | .0183  |
| 68 | HNR05  | (Intercept)                  | 3.6984  | 10.0250 | 0.0000 |
| 69 | HNR05  | HNR05                        | -0.0197 | -2.5508 | .0930  |
| 70 | HNR05  | spGroup(NW)                  | -1.9756 | -3.7954 | .0033  |
| 71 | HNR05  | spGroup(NM)                  | 0.3337  | 0.6534  | 1.0000 |
| 72 | HNR05  | vow(I)                       | -1.0317 | -3.4366 | .0095  |
| 73 | HNR05  | vow(U)                       | 1.5660  | 4.6586  | .0001  |
| 74 | HNR05  | HNR05 x spGroup(NW)          | 0.0242  | 2.3128  | .1695  |
| 75 | HNR05  | HNR05 x spGroup(NM)          | 0.0189  | 1.7788  | .5589  |
| 76 | HNR05  | HNR05 x vow(I)               | 0.0212  | 3.0510  | .0238  |
| 77 | HNR05  | HNR05 x vow(U)               | -0.0302 | -3.9018 | .0021  |
| 78 | HNR05  | spGroup(NW) x vow(I)         | 0.7972  | 1.6470  | .6881  |
| 79 | HNR05  | spGroup(NM) x vow(I)         | 1.3798  | 3.1689  | .0197  |
| 80 | HNR05  | spGroup(NW) x vow(U)         | -1.4978 | -3.0736 | .0233  |
| 81 | HNR05  | spGroup(NM) x vow(U)         | -1.6663 | -3.8252 | .0025  |
| 82 | HNR05  | HNR05 x spGroup(NW) x vow(I) | -0.0156 | -1.4618 | .9115  |
| 83 | HNR05  | HNR05 x spGroup(NM) x vow(I) | -0.0288 | -2.9470 | .0321  |
| 84 | HNR05  | HNR05 x spGroup(NW) x vow(U) | 0.0289  | 2.6863  | .0632  |
| 85 | HNR05  | HNR05 x spGroup(NM) x vow(U) | 0.0329  | 3.3311  | .0129  |
| 86 | HNR15  | (Intercept)                  | 3.7799  | 8.4519  | 0.0000 |
| 87 | HNR15  | HNR15                        | -0.0190 | -2.2425 | .1946  |

|     |       |                              |         |         |        |
|-----|-------|------------------------------|---------|---------|--------|
| 88  | HNR15 | spGroup(NW)                  | -2.0628 | -3.1916 | .0195  |
| 89  | HNR15 | spGroup(NM)                  | 0.3152  | 0.4984  | 1.0000 |
| 90  | HNR15 | vow(I)                       | -1.2952 | -2.9526 | .0320  |
| 91  | HNR15 | vow(U)                       | 2.0389  | 3.9178  | .0021  |
| 92  | HNR15 | HNR15 x spGroup(NW)          | 0.0226  | 1.9206  | .4175  |
| 93  | HNR15 | HNR15 x spGroup(NM)          | 0.0178  | 1.5037  | .8565  |
| 94  | HNR15 | HNR15 x vow(I)               | 0.0235  | 2.7702  | .0526  |
| 95  | HNR15 | HNR15 x vow(U)               | -0.0335 | -3.2711 | .0151  |
| 96  | HNR15 | spGroup(NW) x vow(I)         | 0.9030  | 1.2401  | 1.0000 |
| 97  | HNR15 | spGroup(NM) x vow(I)         | 1.7853  | 2.7207  | .0587  |
| 98  | HNR15 | spGroup(NW) x vow(U)         | -1.8150 | -2.6488 | .0691  |
| 99  | HNR15 | spGroup(NM) x vow(U)         | -2.1479 | -3.2718 | .0151  |
| 100 | HNR15 | HNR15 x spGroup(NW) x vow(I) | -0.0163 | -1.2362 | 1.0000 |
| 101 | HNR15 | HNR15 x spGroup(NM) x vow(I) | -0.0326 | -2.6947 | .0623  |
| 102 | HNR15 | HNR15 x spGroup(NW) x vow(U) | 0.0296  | 2.2416  | .1946  |
| 103 | HNR15 | HNR15 x spGroup(NM) x vow(U) | 0.0352  | 2.7500  | .0553  |
| 104 | HNR25 | (Intercept)                  | 4.2457  | 8.0132  | 0.0000 |
| 105 | HNR25 | HNR25                        | -0.0258 | -2.7343 | .0578  |
| 106 | HNR25 | spGroup(NW)                  | -2.5329 | -3.4198 | .0102  |
| 107 | HNR25 | spGroup(NM)                  | -0.1186 | -0.1630 | 1.0000 |
| 108 | HNR25 | vow(I)                       | -1.5847 | -2.9256 | .0340  |
| 109 | HNR25 | vow(U)                       | 2.6678  | 3.9342  | .0020  |
| 110 | HNR25 | HNR25 x spGroup(NW)          | 0.0292  | 2.2967  | .1721  |
| 111 | HNR25 | HNR25 x spGroup(NM)          | 0.0239  | 1.8295  | .5076  |
| 112 | HNR25 | HNR25 x vow(I)               | 0.0269  | 2.7186  | .0587  |
| 113 | HNR25 | HNR25 x vow(U)               | -0.0419 | -3.4160 | .0100  |
| 114 | HNR25 | spGroup(NW) x vow(I)         | 1.1302  | 1.3645  | 1.0000 |
| 115 | HNR25 | spGroup(NM) x vow(I)         | 2.1171  | 2.7909  | .0500  |
| 116 | HNR25 | spGroup(NW) x vow(U)         | -2.4204 | -2.8532 | .0422  |
| 117 | HNR25 | spGroup(NM) x vow(U)         | -2.7218 | -3.2245 | .0174  |
| 118 | HNR25 | HNR25 x spGroup(NW) x vow(I) | -0.0191 | -1.3412 | 1.0000 |
| 119 | HNR25 | HNR25 x spGroup(NM) x vow(I) | -0.0367 | -2.6720 | .0652  |
| 120 | HNR25 | HNR25 x spGroup(NW) x vow(U) | 0.0379  | 2.5020  | .1032  |
| 121 | HNR25 | HNR25 x spGroup(NM) x vow(U) | 0.0428  | 2.7910  | .0500  |
| 122 | HNR35 | (Intercept)                  | 2.8339  | 19.8584 | 0.0000 |
| 123 | HNR35 | spGroup(NW)                  | -0.9079 | -4.5598 | .0021  |
| 124 | HNR35 | spGroup(NM)                  | 1.1599  | 5.8478  | .0001  |
| 125 | HNR35 | vow(I)                       | -0.1316 | -1.6569 | .6804  |
| 126 | HNR35 | vow(U)                       | 0.3330  | 3.9897  | .0017  |
| 127 | HNR35 | spGroup(NW) x vow(I)         | 0.1542  | 1.5219  | .8323  |
| 128 | HNR35 | spGroup(NM) x vow(I)         | 0.1352  | 1.3709  | 1.0000 |
| 129 | HNR35 | spGroup(NW) x vow(U)         | -0.3322 | -3.0947 | .0233  |
| 130 | HNR35 | spGroup(NM) x vow(U)         | -0.3155 | -3.0615 | .0233  |
| 131 | SHR   | (Intercept)                  | 2.8339  | 19.8584 | 0.0000 |
| 132 | SHR   | spGroup(NW)                  | -0.9079 | -4.5598 | .0021  |
| 133 | SHR   | spGroup(NM)                  | 1.1599  | 5.8478  | .0001  |

|     |     |                      |         |         |        |
|-----|-----|----------------------|---------|---------|--------|
| 134 | SHR | vow(l)               | −0.1316 | −1.6569 | .6804  |
| 135 | SHR | vow(U)               | 0.3330  | 3.9897  | .0017  |
| 136 | SHR | spGroup(NW) × vow(l) | 0.1542  | 1.5219  | .8323  |
| 137 | SHR | spGroup(NM) × vow(l) | 0.1352  | 1.3709  | 1.0000 |
| 138 | SHR | spGroup(NW) × vow(U) | −0.3322 | −3.0947 | .0233  |
| 139 | SHR | spGroup(NM) × vow(U) | −0.3155 | −3.0615 | .0233  |

*Note.* Significant results are highlighted in gray. Column 2 = labels of the tested parameters; Column 3 = model estimates; Column 4 = *t* values; Column 5 = *p* values adjusted according to the False Discovery Rate criterion.
